# Supplementary material for: In Vitro Selection of Mutant HDM2 Resistant to Nutlin Inhibition
Source: PubMed Central journal article supplement (PMC3641235; doi:10.1371/journal.pone.0062564), 2013-04-30

**Figure S1**

**A.**

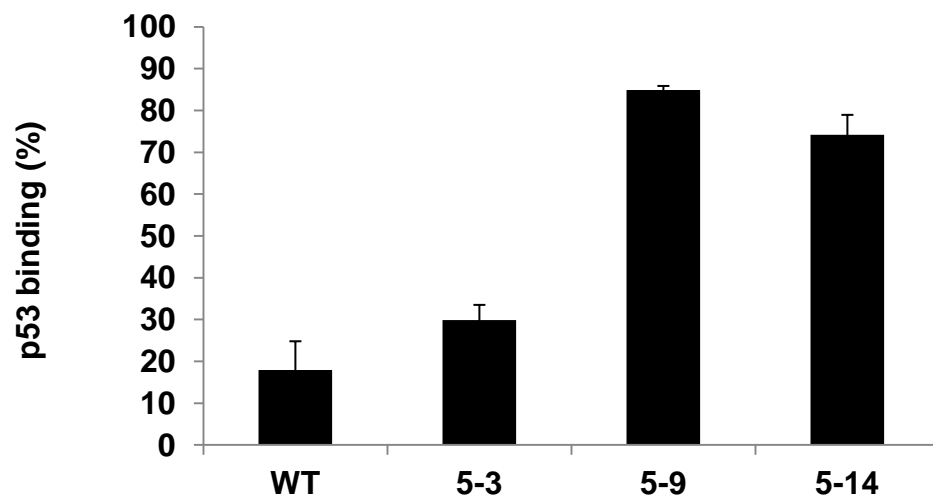

**B.**

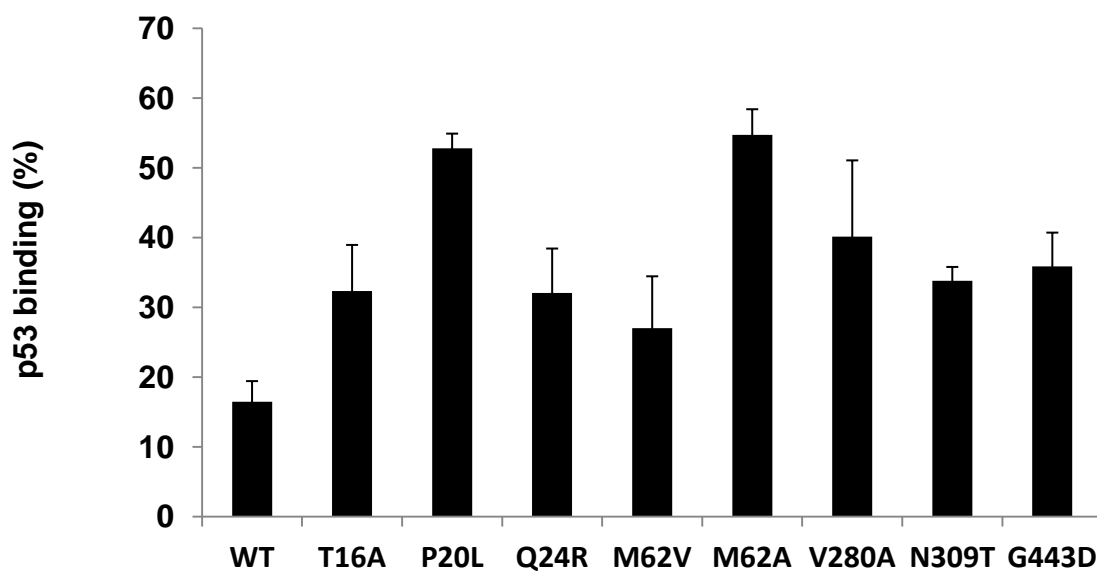

**C.**

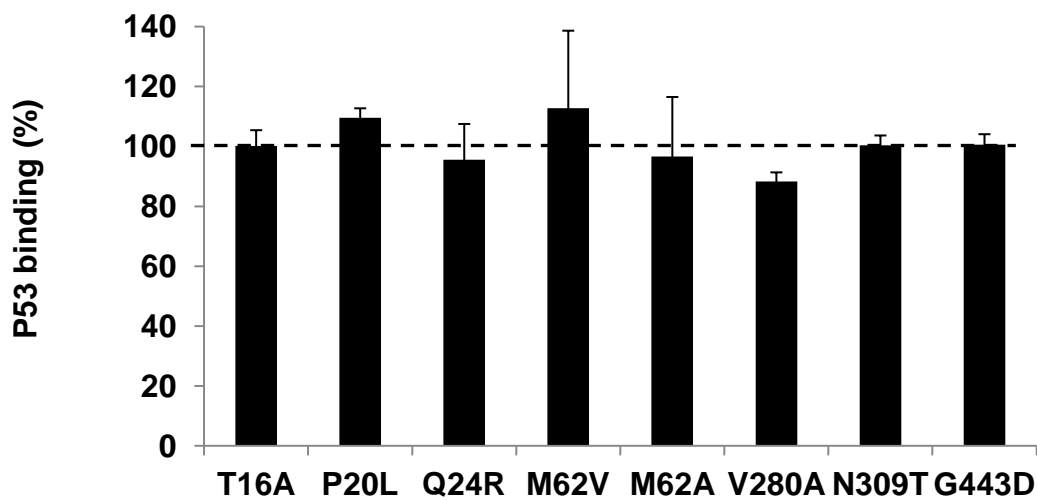

**Figure S2**

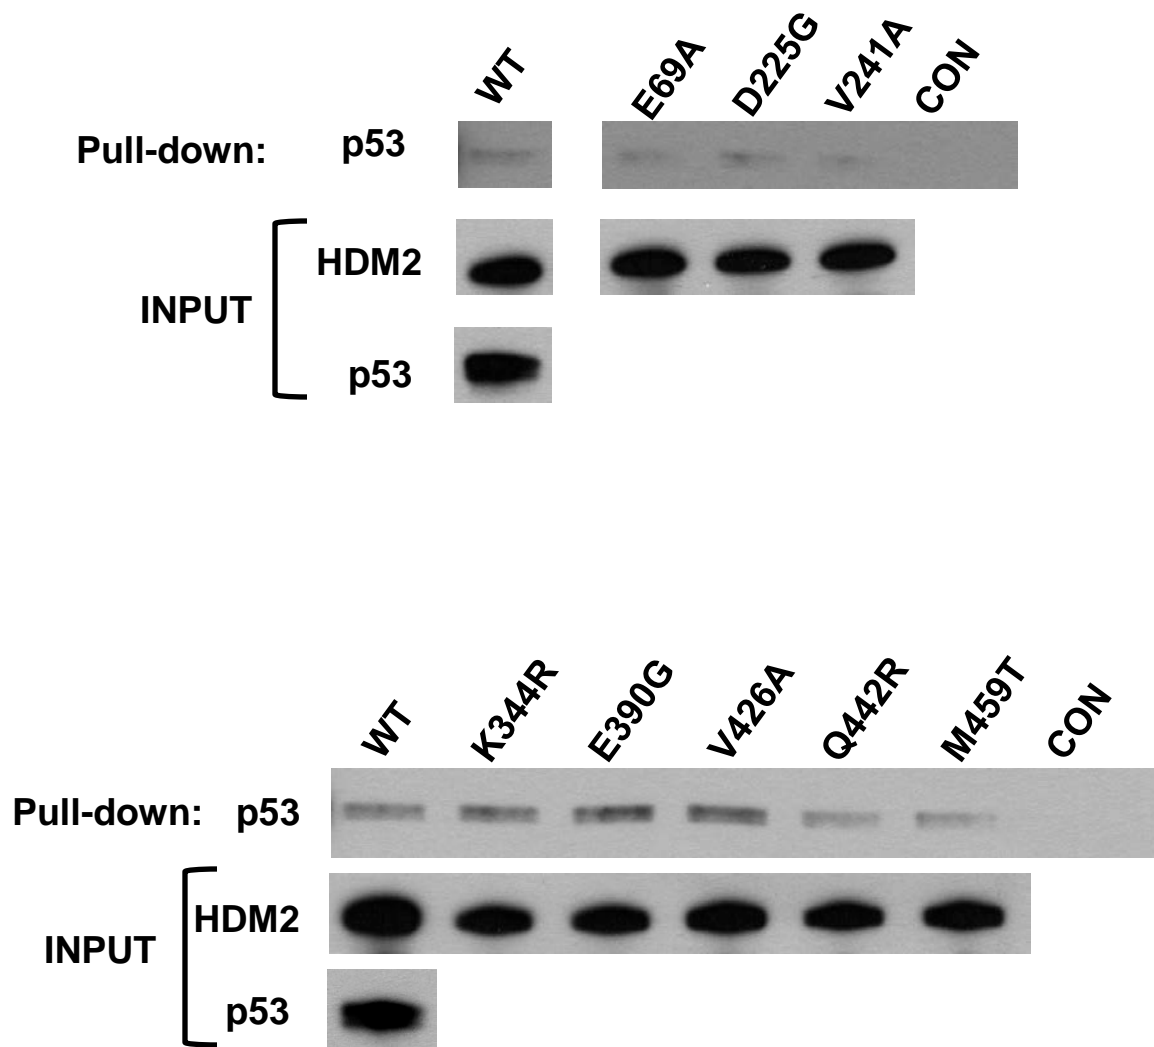

Figure S3

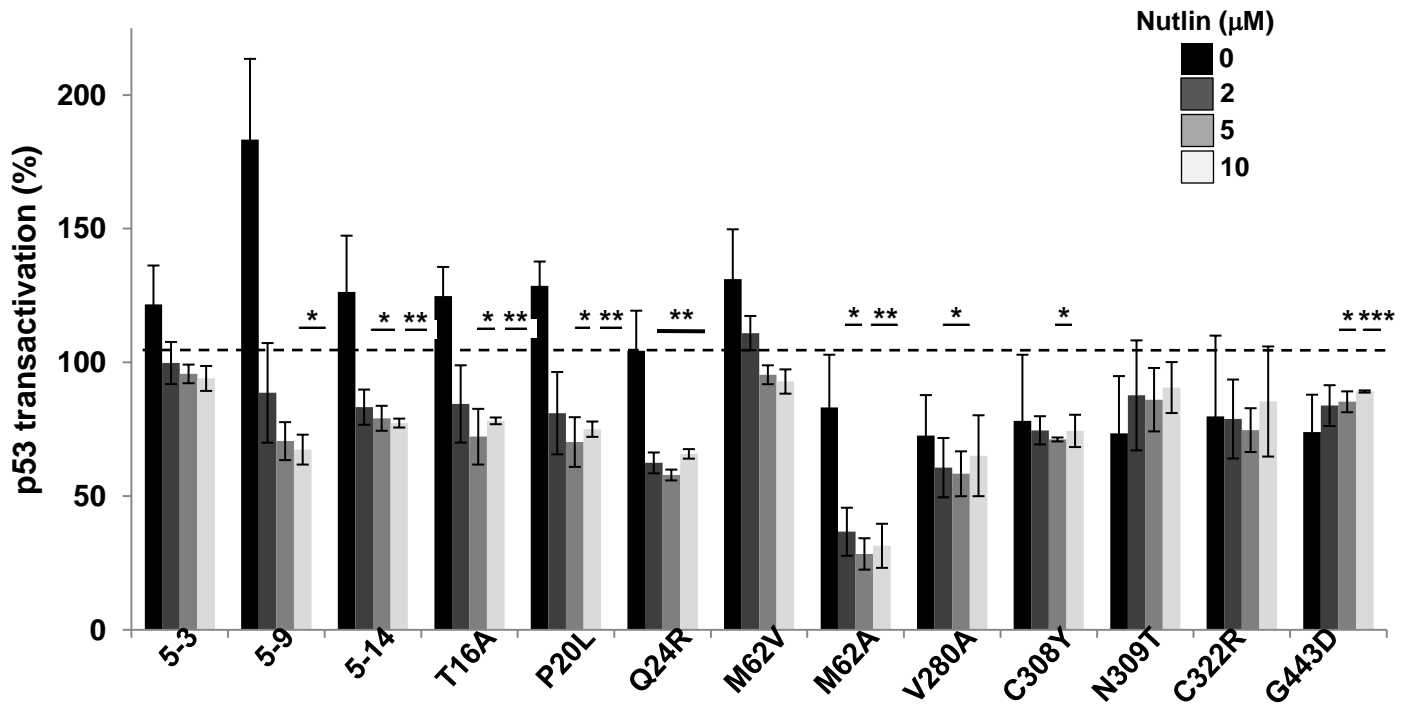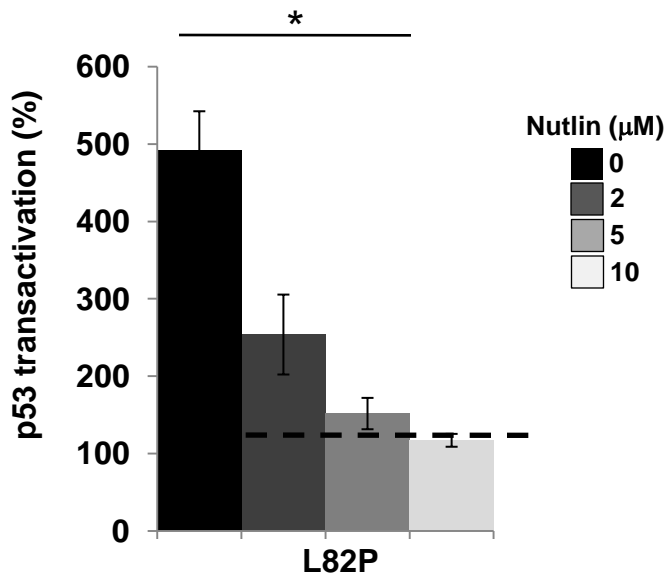

Figure S4

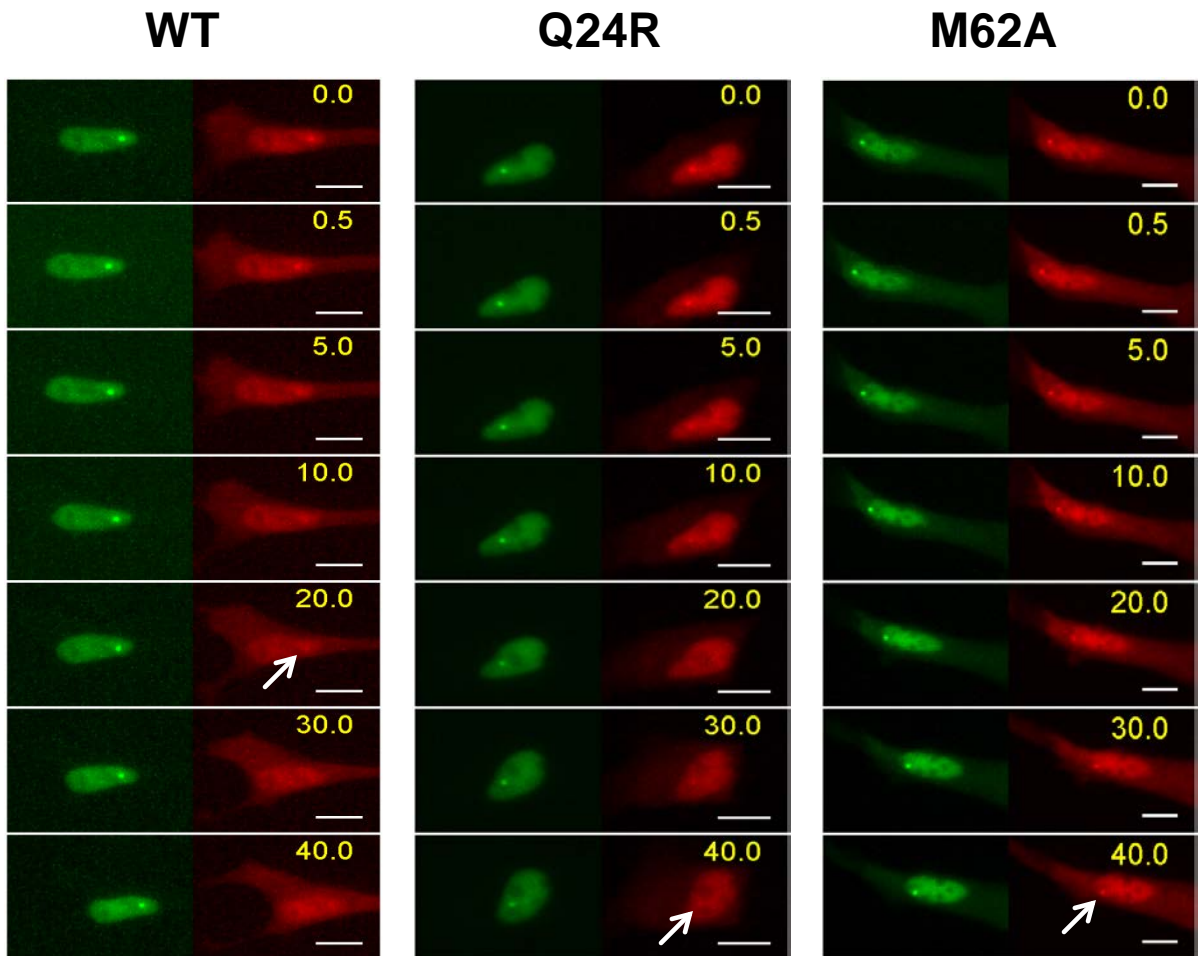

**Figure S5**

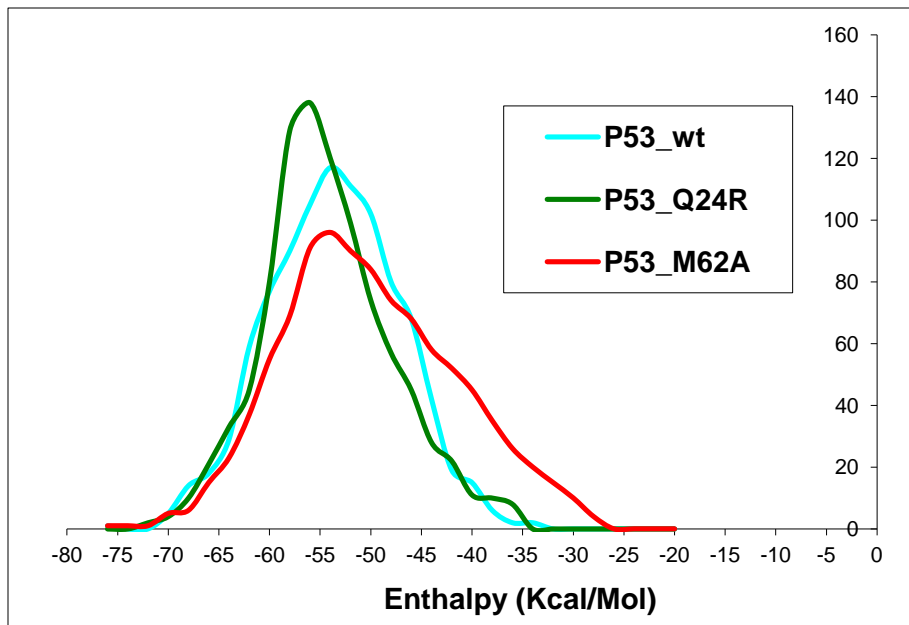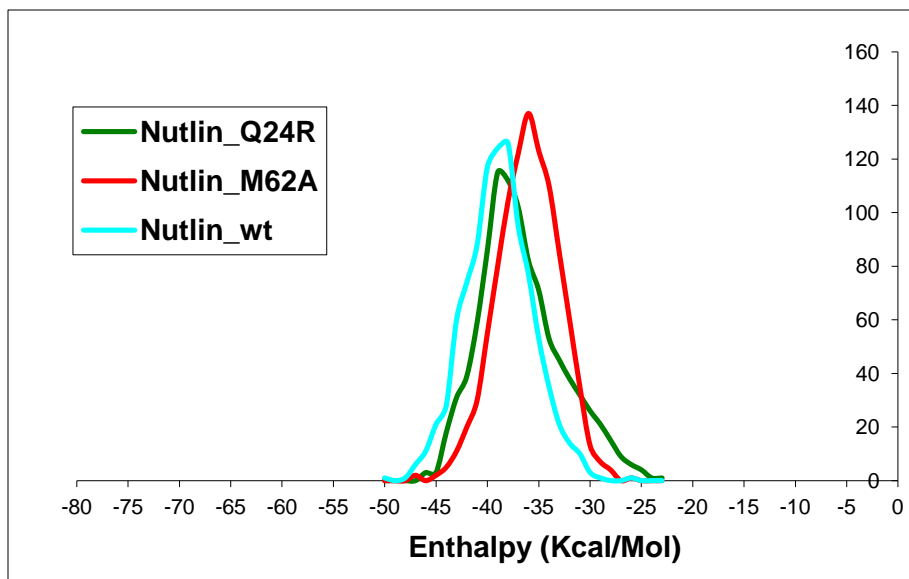

Supplement: pone.0062564.s001.pdf [file pone.0062564.s001.pdf]
